# Supplementary material for: Interleukin-10 Prevents Diet-Induced Insulin Resistance by Attenuating Macrophage and Cytokine Response in Skeletal Muscle
Source: PubMed Central journal article supplement — Diabetes. 2009 Aug 18;58(11):2525–35. doi: 10.2337/db08-1261 (PMC2768157; doi:10.2337/db08-1261), 2009-08-18

**Supplementary Table 1.** Composition of high-fat diet (Harlan Teklad TD93075) and standard chow diet (Harlan Teklad LM-485).

|                                                | <b>High-Fat Diet (4.8 Kcal/g)</b> | <b>Chow Diet (3.1 Kcal/g)</b>     |
|------------------------------------------------|-----------------------------------|-----------------------------------|
| <b>Nutrient Information</b>                    | % kcal from                       | % kcal from                       |
| Protein                                        | 21.2                              | 25.0                              |
| Carbohydrate                                   | 24.0                              | 58.0                              |
| Fat                                            | 54.8                              | 17.0                              |
|                                                |                                   |                                   |
| <b>Formula</b>                                 | <b>g/Kg</b>                       | <b>Representative Ingredients</b> |
| Casein                                         | 289.0                             | Ground corn                       |
| DL-Methionine                                  | 3.33                              | Dehulled soybean meal             |
| Corn Starch                                    | 207.3                             | Ground oats                       |
| Sucrose                                        | 90.5                              | Wheat middlings                   |
| Vegetable Shortening,<br>hydrogenated (Primex) | 274.1                             | Dehydrated alfalfa meal           |
| Corn Oil                                       | 16.0                              | Soybean oil                       |
| Cellulose                                      | 53.12                             | Corn gluten meal                  |
| Vitamin Mix, Teklad (40060)                    | 13.33                             | Iodized salt                      |
| Mineral Mix, AIN-76 (170915)                   | 46.66                             | Brewers dried yeast               |
| Calcium Carbonate                              | 6.66                              | Calcium carbonate                 |
|                                                |                                   |                                   |
| <b>Approx. Fatty Acid Profile</b>              | <b>% of Total Fat</b>             |                                   |
| Saturated-Fat                                  | 28%                               |                                   |
| Trans-Fat                                      | 30%                               |                                   |
| Monounsaturated (cis)-Fat                      | 28%                               |                                   |
| Polyunsaturated (cis)-Fat                      | 14%                               |                                   |

**Supplementary Figure 1.** Skeletal muscle insulin signaling and adipose tissue glucose uptake in mice fed chow or HFD for 3 wks with a 3-day IL-10 or saline (control) treatment. Muscle samples were obtained 15 min after insulin injection. **A.** Insulin-stimulated tyrosine phosphorylation of IRS-1 and IRS-1 protein levels in chow and HFD-fed mice. **B.** Insulin-stimulated glucose uptake in white adipose tissue. \* $P < 0.05$  vs. HFD. Values are means  $\pm$  S.E. for 4~8 mice in each experimental group. A Student's t-test was used in A, and a 2-way ANOVA was used in B for statistical analysis.

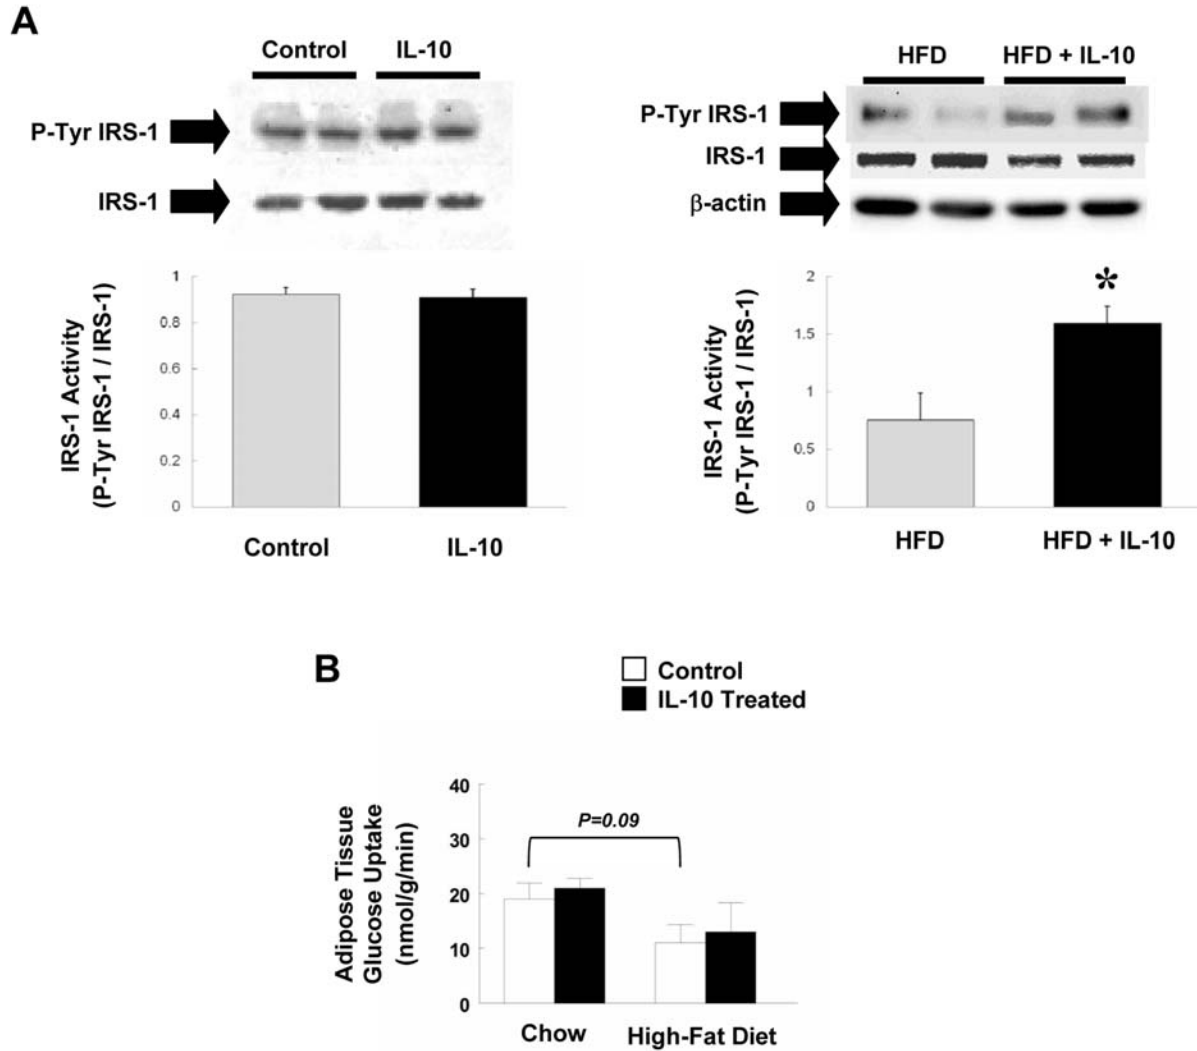

**Supplementary Figure 2.** Metabolic cage analysis of WT and MCK-IL10 mice following chow or HFD. **A.** Daily  $VO_2$  consumption in chow-fed WT and MCK-IL10 mice. **B.** Daily  $VO_2$  consumption in HFD-fed WT and MCK-IL10 mice. Values are means $\pm$ S.E. for 4 mice in each experimental group.

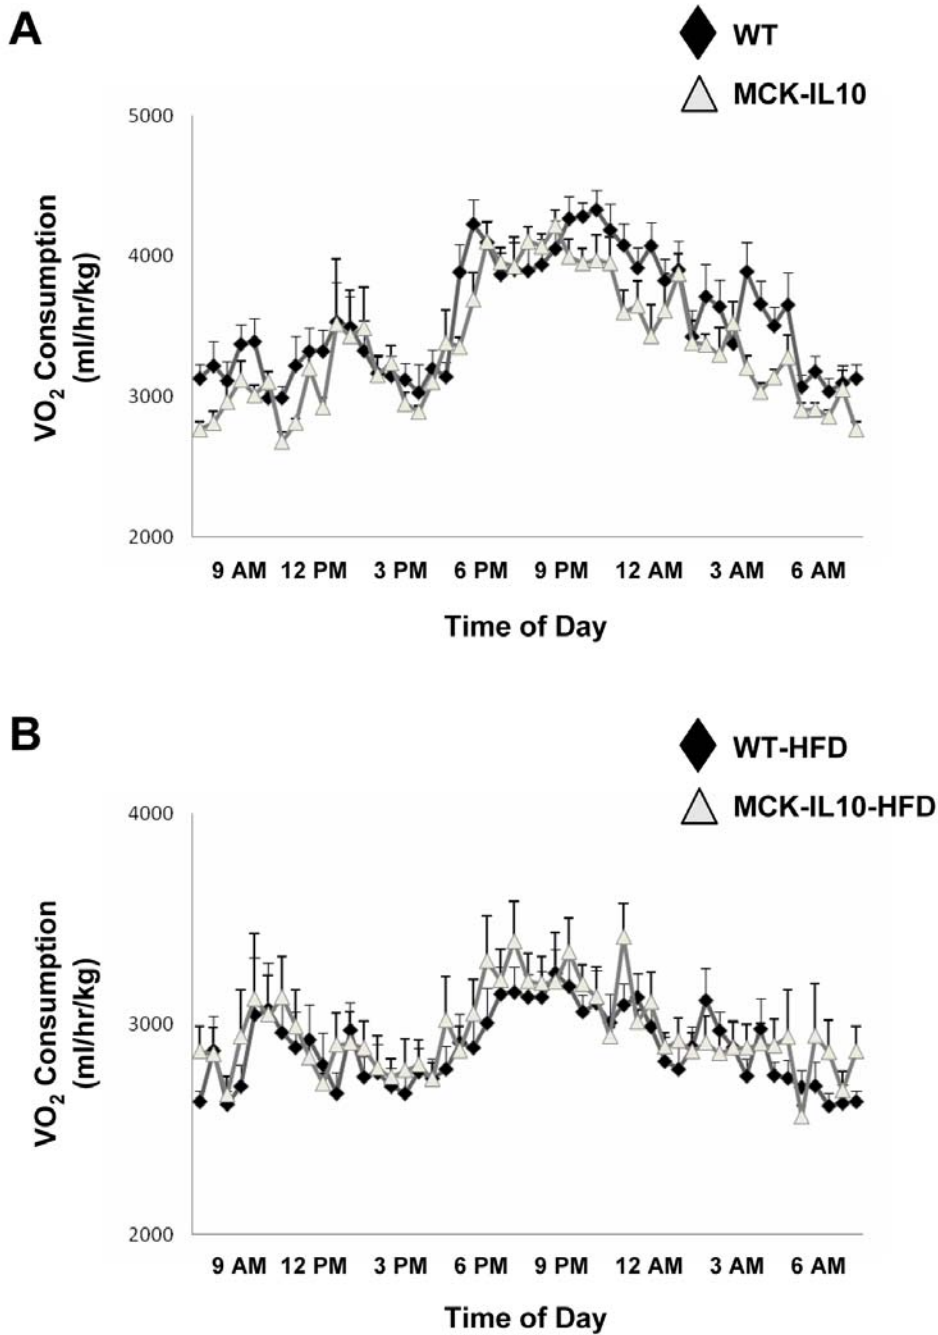

Supplement: supp_db08-1261_db08-1261_Online_appendix.pdf [file supp_db08-1261_db08-1261_Online_appendix.pdf]
